# Supplementary material for: Effects of the recognition sites of MOFs on turn-off fluorescence detection of Fe3+
Source: Royal Society of Chemistry journal article supplement (doi:10.1039/d4ce00899e), 2024-01-01
Supplement: d4ce00899e1.pdf [file d4ce00899e1.pdf]

## Supporting Information

### Recognition sites effects on turn off fluorescence detection of Fe<sup>3+</sup>

Senlin Li,<sup>a</sup> Yanan Gu,<sup>a</sup> Bo Zhao,<sup>a</sup> Haocheng Cai,<sup>a</sup> Zhuo Zhao,<sup>a</sup> Qiaozhen Sun,<sup>\*a</sup>  
Bingguang Zhang<sup>\*b</sup>

<sup>a</sup>*School of Materials Science and Engineering, Central South University, Changsha, 410083, China*

<sup>b</sup>*Key Laboratory of Catalysis and Materials Sciences of the State Ethnic Affairs Commission & Ministry of Education, College of Chemistry and Material Science, South-Central University for Nationalities, Wuhan, 430074, China*

Email: [rosesunqz@csu.edu.cn](mailto:rosesunqz@csu.edu.cn) (Q.-Z. Sun); [3092809@mail.scuec.edu.cn](mailto:3092809@mail.scuec.edu.cn) (B.-G. Zhang)

## Contents

|                                                                |    |
|----------------------------------------------------------------|----|
| Section 1 General characterizations and structural information | S3 |
| Section 2 Detection of Fe <sup>3+</sup>                        | S6 |

## Section 1 General characterizations and structural information

**Table S1** Selected Bond Lengths (Å) and Bond Angles (°) for **1** and **2**

| <b>1</b>            |            |                     |            |
|---------------------|------------|---------------------|------------|
| Cd(1)-N(2)          | 2.278(3)   | Cd(1)-O(2)          | 2.286(3)   |
| Cd(1)-N(4)#1        | 2.290(3)   | Cd(1)-O(4)          | 2.340(3)   |
| Cd(1)-O(5)          | 2.367(3)   | Cd(1)-O(1)          | 2.490(3)   |
| <i>Continue</i>     |            |                     |            |
| N(2)-Cd(1)-O(2)     | 144.27(11) | N(2)-Cd(1)-N(4)#1   | 93.02(11)  |
| O(2)-Cd(1)-N(4)#1   | 93.32(12)  | N(2)-Cd(1)-O(4)     | 92.67(11)  |
| O(2)-Cd(1)-O(4)     | 98.86(12)  | N(4)#1-Cd(1)-O(4)   | 150.33(11) |
| N(2)-Cd(1)-O(5)     | 112.37(12) | O(2)-Cd(1)-O(5)     | 101.91(11) |
| N(4)#1-Cd(1)-O(5)   | 95.74(11)  | O(4)-Cd(1)-O(5)     | 55.36(10)  |
| N(2)-Cd(1)-O(1)     | 90.14(10)  | O(2)-Cd(1)-O(1)     | 54.16(9)   |
| N(4)#1-Cd(1)-O(1)   | 97.45(11)  | O(4)-Cd(1)-O(1)     | 111.63(10) |
| O(5)-Cd(1)-O(1)     | 153.19(11) |                     |            |
| <b>2</b>            |            |                     |            |
| Cd(1)-O(10)#1       | 2.261(3)   | Cd(1)-O(9)          | 2.265(3)   |
| Cd(1)-O(3)          | 2.279(3)   | Cd(1)-N(3)          | 2.318(3)   |
| Cd(1)-N(2)          | 2.345(3)   | Cd(1)-O(2)          | 2.530(3)   |
| Cd(2)-O(4)          | 2.313(3)   | Cd(2)-N(4)          | 2.336(3)   |
| Cd(2)-N(5)          | 2.341(3)   | Cd(2)-O(5)#2        | 2.338(3)   |
| Cd(2)-O(7)#3        | 2.373(3)   | Cd(2)-O(8)#3        | 2.383(3)   |
| O(10)#1-Cd(1)-O(9)  | 117.21(10) | O(10)#1-Cd(1)-O(3)  | 95.54(11)  |
| O(9)-Cd(1)-O(3)     | 86.80(10)  | O(10)#1-Cd(1)-N(3)  | 89.56(12)  |
| O(9)-Cd(1)-N(3)     | 89.51(11)  | O(3)-Cd(1)-N(3)     | 174.67(11) |
| O(10)#1-Cd(1)-N(2)  | 140.90(12) | O(9)-Cd(1)-N(2)     | 96.81(10)  |
| O(3)-Cd(1)-N(2)     | 105.59(11) | N(3)-Cd(1)-N(2)     | 71.02(12)  |
| O(10)#1-Cd(1)-O(2)  | 83.39(10)  | O(9)-Cd(1)-O(2)     | 138.62(10) |
| O(3)-Cd(1)-O(2)     | 54.20(9)   | N(3)-Cd(1)-O(2)     | 128.24(10) |
| N(2)-Cd(1)-O(2)     | 82.99(10)  | O(4)-Cd(2)-N(4)     | 90.81(11)  |
| O(4)-Cd(2)-N(5)     | 84.05(11)  | N(4)-Cd(2)-N(5)     | 70.17(12)  |
| O(4)-Cd(2)-O(5)#2   | 126.31(10) | N(4)-Cd(2)-O(5)#2   | 88.60(12)  |
| N(5)-Cd(2)-O(5)#2   | 143.97(11) | O(4)-Cd(2)-O(7)#3   | 83.66(10)  |
| N(4)-Cd(2)-O(7)#3   | 170.50(12) | N(5)-Cd(2)-O(7)#3   | 101.48(12) |
| O(5)#2-Cd(2)-O(7)#3 | 100.89(11) | O(4)-Cd(2)-O(8)#3   | 134.07(11) |
| N(4)-Cd(2)-O(8)#3   | 127.39(11) | N(5)-Cd(2)-O(8)#3   | 86.48(11)  |
| O(5)#2-Cd(2)-O(8)#3 | 83.94(11)  | O(7)#3-Cd(2)-O(8)#3 | 54.53(10)  |

Symmetry codes: for **1**:  $-x+1/2, y+1/2, -z-1/2$ ; for **2**: #1:  $-x, -y, -z+1$ ; #2:  $-x+1, -y, -z+2$ ; #3:  $x+1, y, z+1$ .

**Table S2** Hydrogen bond distances (Å) and bond angles (°) for **1** and **2**

| D-H...A                | d(D-H) | d(H...A) | d(D...A)  | ∠(DHA) |
|------------------------|--------|----------|-----------|--------|
| <b>1</b>               |        |          |           |        |
| OW(1)-HW(1C)...O(4)#1  | 0.85   | 2.11     | 2.953(5)  | 172    |
| OW(1)-HW(1D)...OW(3)#2 | 0.85   | 2.01     | 2.855(10) | 174    |
| N(3)-H(3A)...OW3       | 0.86   | 2.08     | 2.886(8)  | 156    |
| N(3)-H(3A)...OW3'      | 0.86   | 2.06     | 2.915(12) | 173    |
| C(11)-H(11A)...O(2)#3  | 0.96   | 2.48     | 3.352(5)  | 150    |
| C(15)-H(15A)...O(4)#1  | 0.93   | 2.56     | 3.256(4)  | 132    |
| <b>2</b>               |        |          |           |        |
| C(1)-H(1A)...O(8)#1    | 0.93   | 2.35     | 3.273(5)  | 173    |
| C(9)-H(9A)...O(3)#2    | 0.93   | 2.49     | 3.370(6)  | 152    |
| C(21)-H(21A)...O(3)#1  | 0.93   | 2.52     | 3.353(6)  | 149    |
| C(22)-H(22A)...O(7)#1  | 0.93   | 2.42     | 3.253(6)  | 149    |
| C(25)-H(25A)...O(2)#3  | 0.93   | 2.57     | 3.374(5)  | 145    |
| C(32)-H(32A)...O(2)#1  | 0.93   | 2.44     | 3.371(5)  | 175    |
| C(41)-H(41C)...S(1)#2  | 0.96   | 2.94     | 3.802(5)  | 151    |

Symmetry codes: for **1**: #1:  $-x+1/2, y+1/2, -z+1/2$ ; #2:  $-x-1, -y, -z-1$ ; #3:  $x+1, y, z$ ; for **2**: #1:  $-x, -y, -z+1$ ; #2:  $-x, -y-1, -z+1$ ; #3:  $x+1, y, z$ .

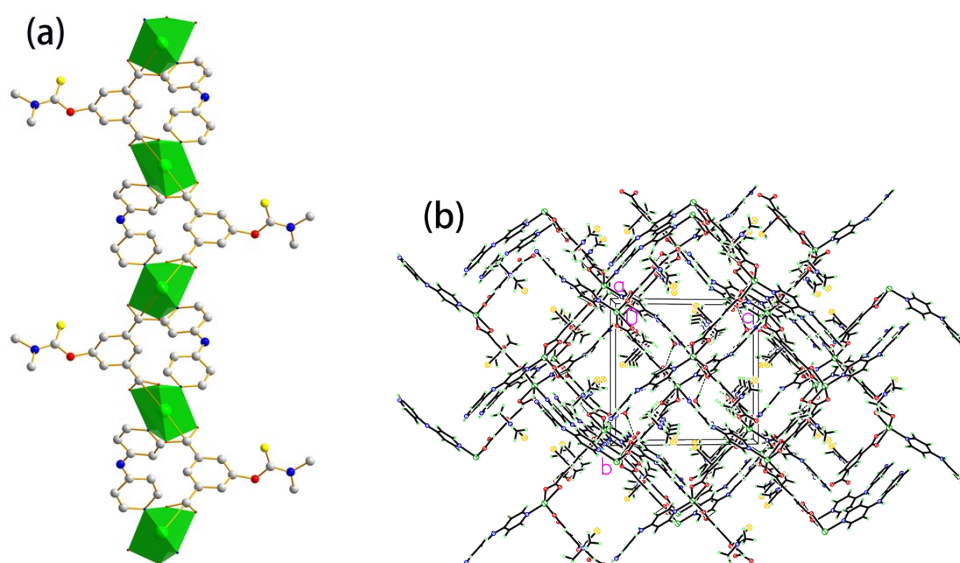

**Fig. S1** (a) The two-dimensional (2D) plane of compound **1** along  $c$  axis; (b) The packing diagram of **1**. The hydrogen bonds are shown in dashed lines.

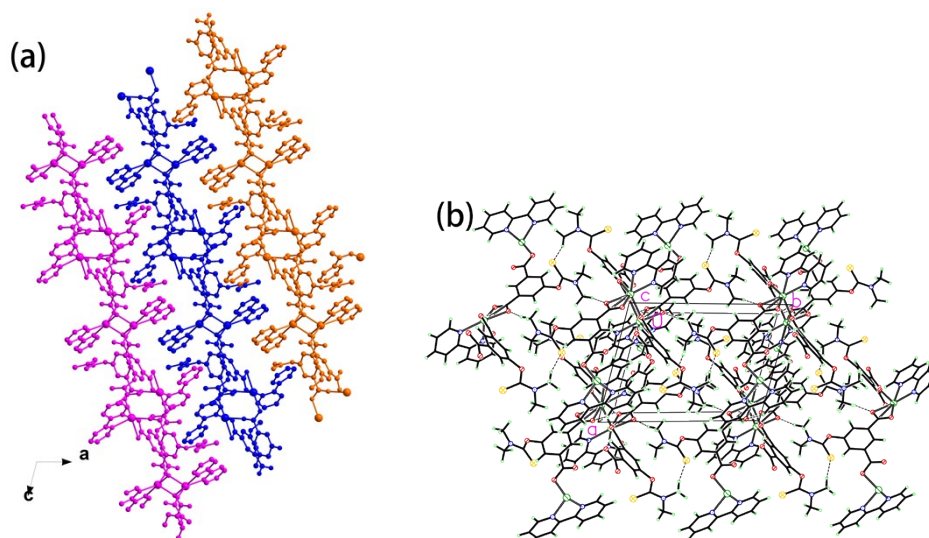

**Fig. S2** (a) The neighboring chains along b axis; (b) The packing diagram of compound 2. The hydrogen bonds are shown in dashed lines.

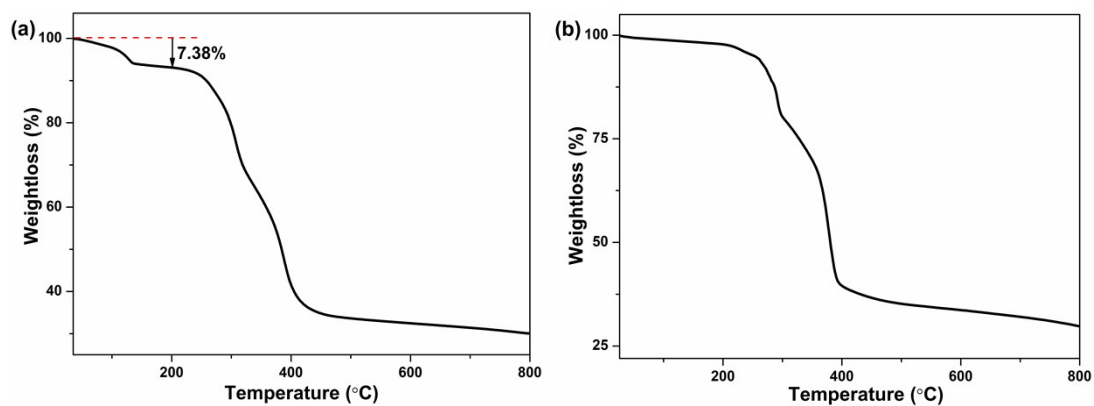

**Fig. S3** The thermal analysis curve of compound 1 (a) and 2 (b).

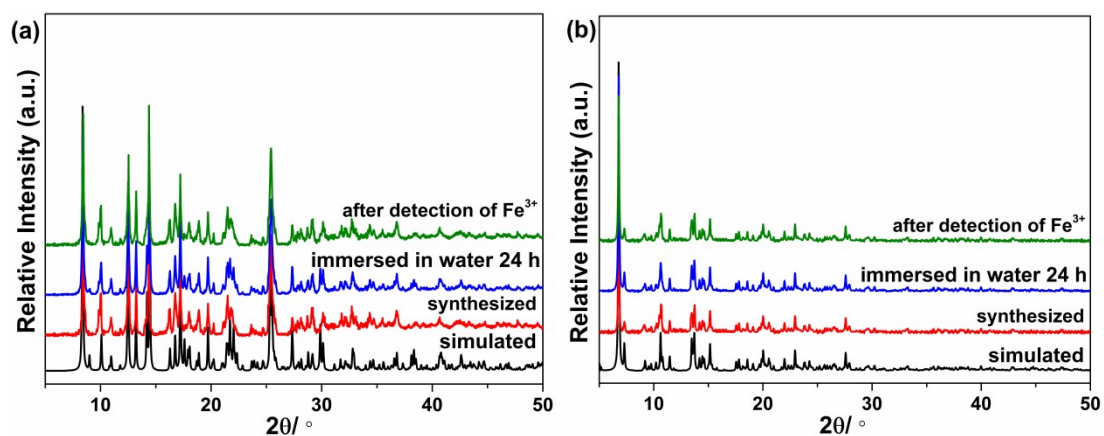

**Fig. S4** PXRD pattern of compound 1 (a) and 2 (b), the immersed sample and the detection of Fe<sup>3+</sup> and 4-NP.

## Section 2 Detection of Fe<sup>3+</sup>

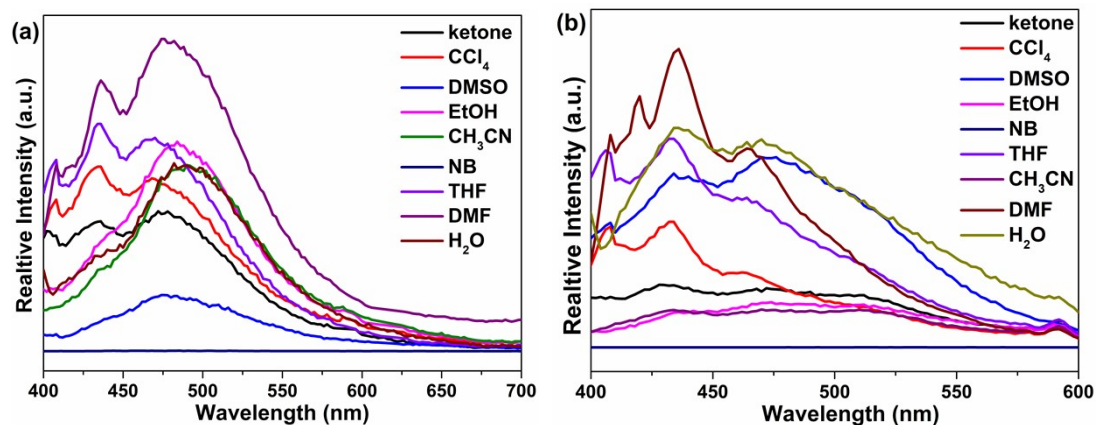

Fig. S5 Luminescent spectra of 1 (a) ( $\lambda_{\text{ex}}$ : 302 nm) and 2 (b) ( $\lambda_{\text{ex}}$ : 356 nm) in different solvents (Condition: 5 mg 1, 3 mL solvent).

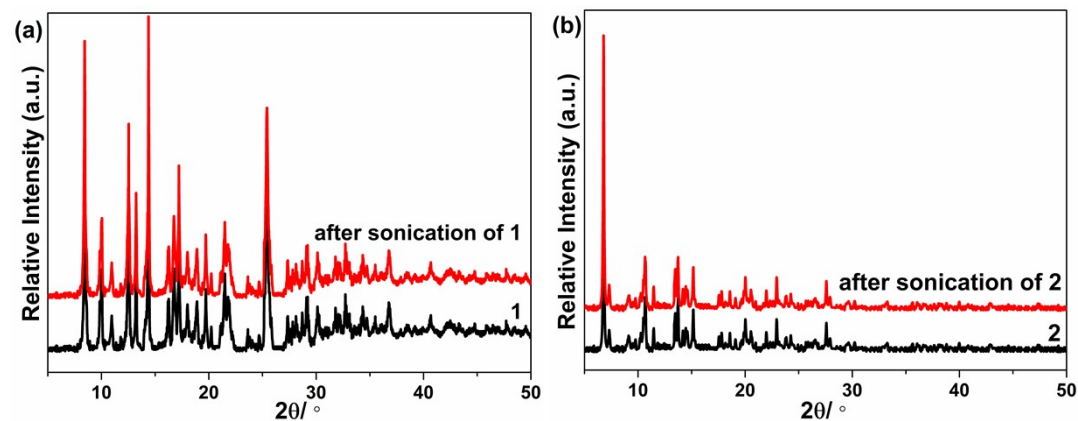

Fig. S6 PXRD pattern of compounds 1 (a) and 2 (b) before and after sonication in water.

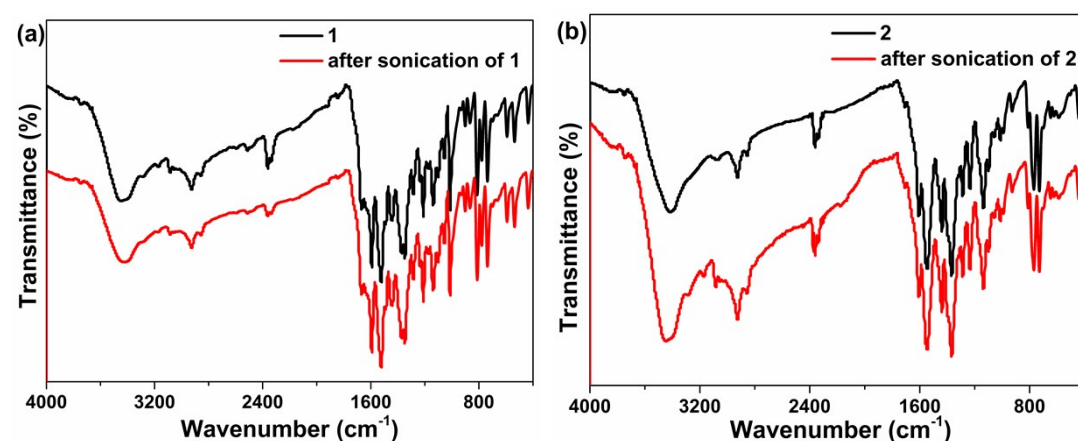

Fig. S7 IR spectra of compounds 1 (a) and 2 (b) before and after sonication in water.

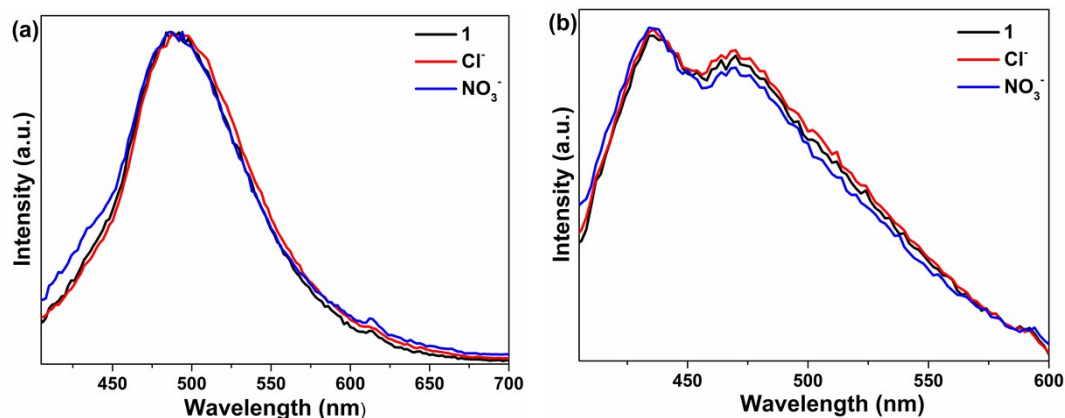

**Fig. S8** The emission spectra of **1** (a) and **2** (b) immersed in water solution of NaCl and NaNO<sub>3</sub>, respectively (Condition: 5 mg **1** (**2**), 3 mL H<sub>2</sub>O and 0.02 mmol Na<sup>+</sup> ion).

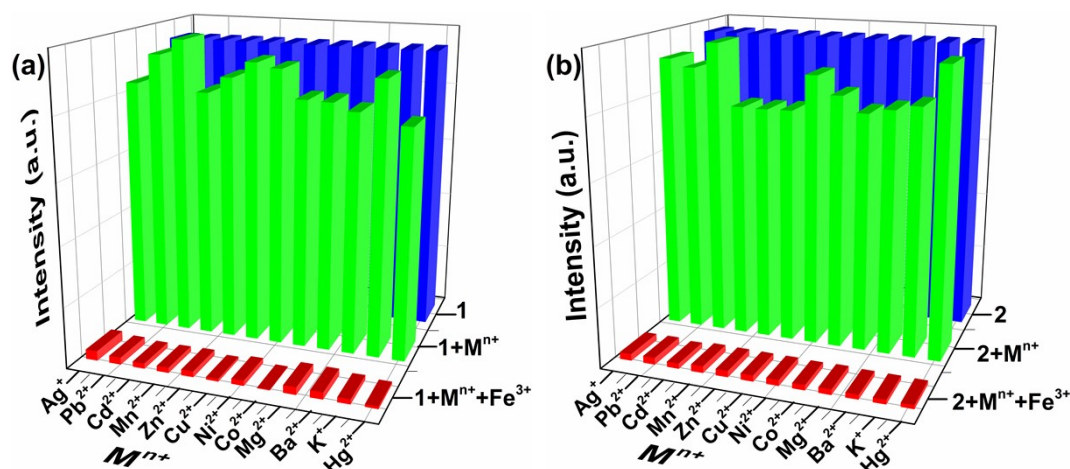

**Fig. S9** The competition experiments of **1** (a) and **2** (b) for detection of Fe<sup>3+</sup> ions in the presence of the interfering metal cations (Condition: 5 mg **1** (**2**), 3 mL H<sub>2</sub>O, 10 μL M<sup>n+</sup> ions (0.1 M) and 10 μL Fe<sup>3+</sup> (0.01 M)).

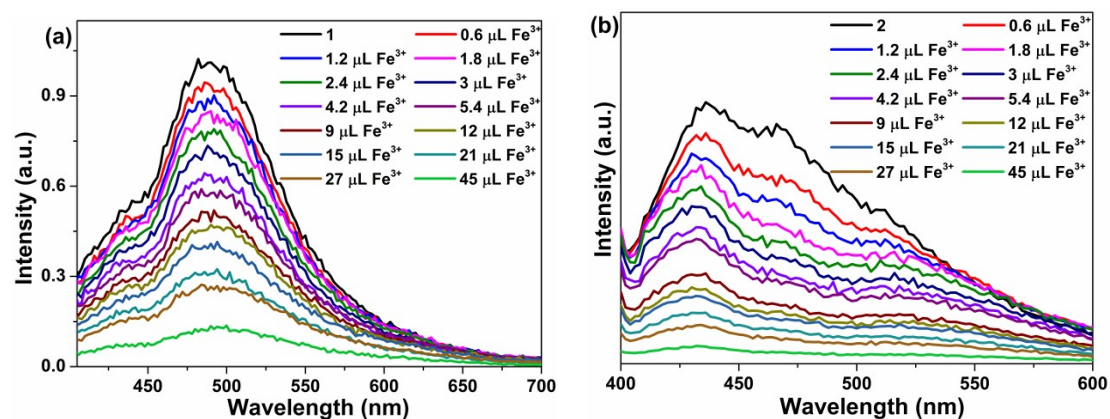

**Fig. S10** Fluorescent spectra of **1** (a) and **2** (b) suspension (1.67 mg/mL) upon incremental addition of Fe<sup>3+</sup> (0.01 M).

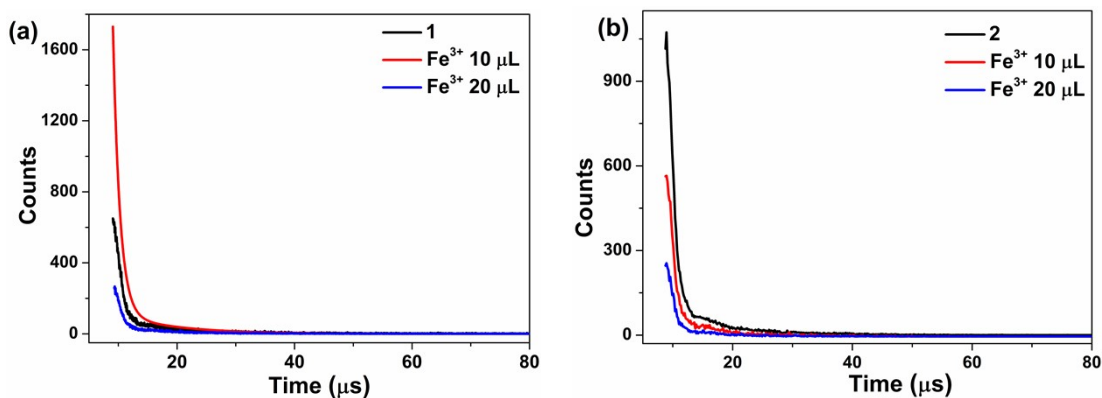

Fig. S11 The fluorescence decay curves of **1** (a) and **2** (b) in  $\text{Fe}^{3+}$  solution (0.01 M).

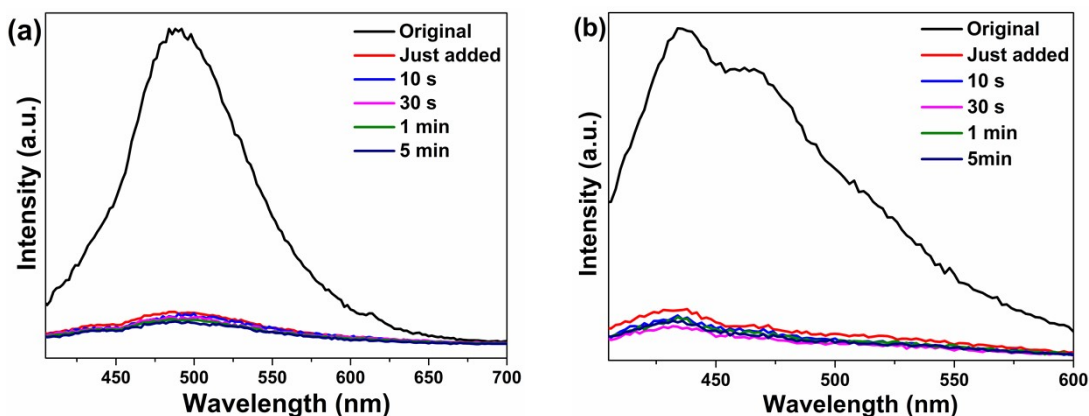

Fig. S12 Time-dependent fluorescent quenching detections of **1** (a) and **2** (b) for  $\text{Fe}^{3+}$ .

To calculate the standard deviation and detection limit of this detection method, 5 mg **1** (**2**) was well ground and suspended in 3 mL  $\text{H}_2\text{O}$ . Then,  $\text{Fe}^{3+}$  ion solution (0.01 M) was added into the suspension and the fluorescent intensities were recorded. Standard deviation ( $\sigma$ ) was calculated from five blank tests of **1** (**2**) suspension and the detection limit was calculated via the formula:  $3\sigma/k$  ( $k$ : slope of the straight line).

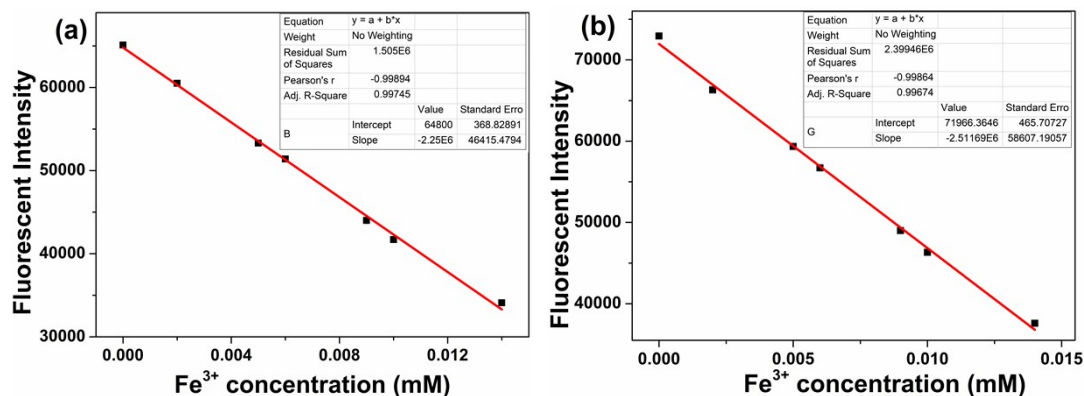

Fig. S13 Linear curve of fluorescent intensity of **1** (a) and **2** (b) suspension upon incremental addition of  $\text{Fe}^{3+}$ .



**Table S3** Standard deviation calculation

|                                 | Fluorescent intensity ( $\times 10^4$ ) |
|---------------------------------|-----------------------------------------|
| <b>Compound 1</b>               |                                         |
| Test 1                          | 6.510                                   |
| Test 2                          | 6.522                                   |
| Test 3                          | 6.512                                   |
| Test 4                          | 6.515                                   |
| Test 5                          | 6.518                                   |
| Standard deviation ( $\sigma$ ) | 0.0048                                  |
| <b>Compound 2</b>               |                                         |
| Test 1                          | 6.450                                   |
| Test 2                          | 6.439                                   |
| <i>Continue</i>                 |                                         |
| Test 3                          | 6.446                                   |
| Test 4                          | 6.456                                   |
| Test 5                          | 6.444                                   |
| Standard deviation ( $\sigma$ ) | 0.0064                                  |

**Table S4** Detection limit calculation for  $\text{Fe}^{3+}$ 

| Compounds                       |                                    |
|---------------------------------|------------------------------------|
| <b>1</b>                        |                                    |
| Slope (k)                       | $2.25 \times 10^6 \text{ mM}^{-1}$ |
| Detection limit ( $3\sigma/k$ ) | $6.40 \times 10^{-5} \text{ mM}$   |
| <b>2</b>                        |                                    |
| Slope (k)                       | $2.51 \times 10^6 \text{ mM}^{-1}$ |
| Detection limit ( $3\sigma/k$ ) | $7.65 \times 10^{-5} \text{ mM}$   |

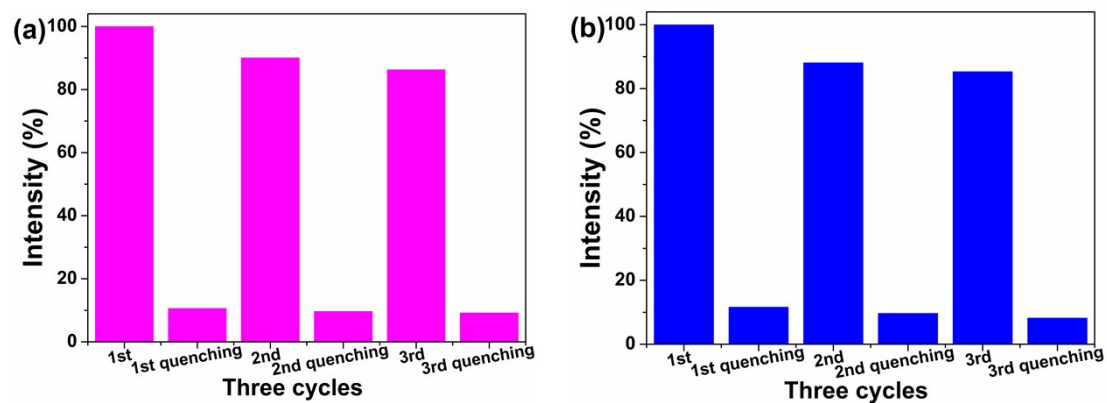**Fig. S14** Three quenching cycles of **1** (a) and **2** (b) suspension after addition of  $\text{Fe}^{3+}$ .

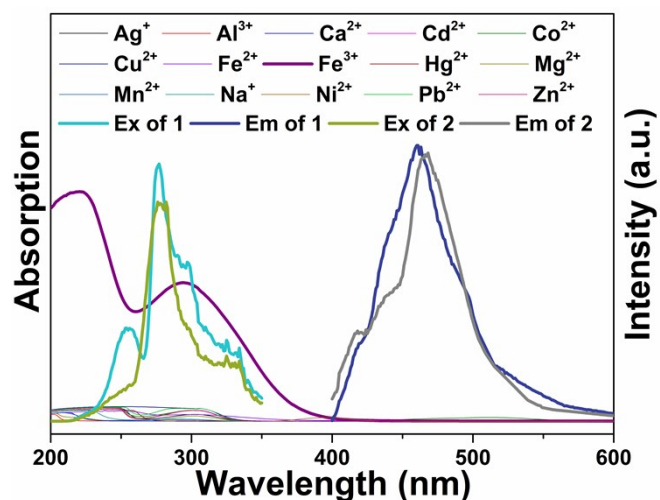

**Fig. S15** UV-vis spectra of metal salts, the excitation and emission spectra of **1** and **2**, showing their overlapping.

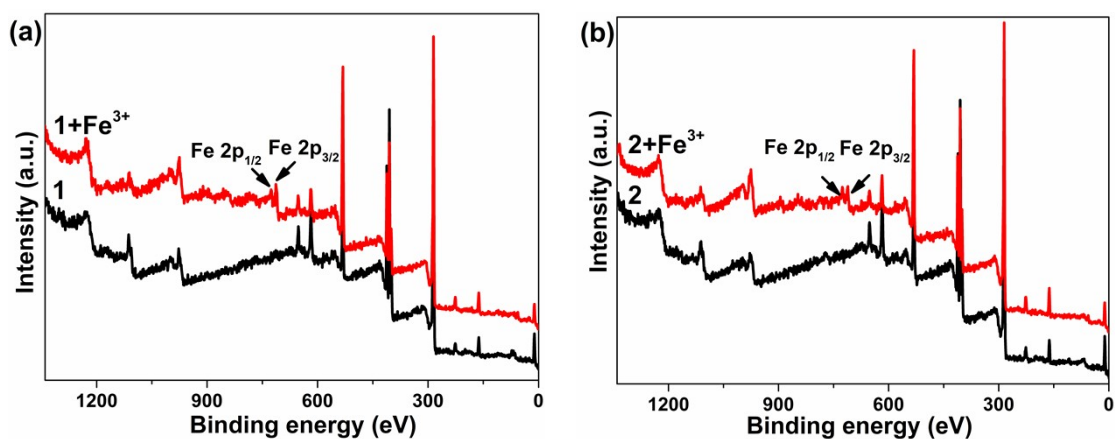

**Fig. S16** XPS for compound **1** and  $\text{Fe}^{3+}$  incorporating **1** (a), **2** and  $\text{Fe}^{3+}$  incorporating **2**.

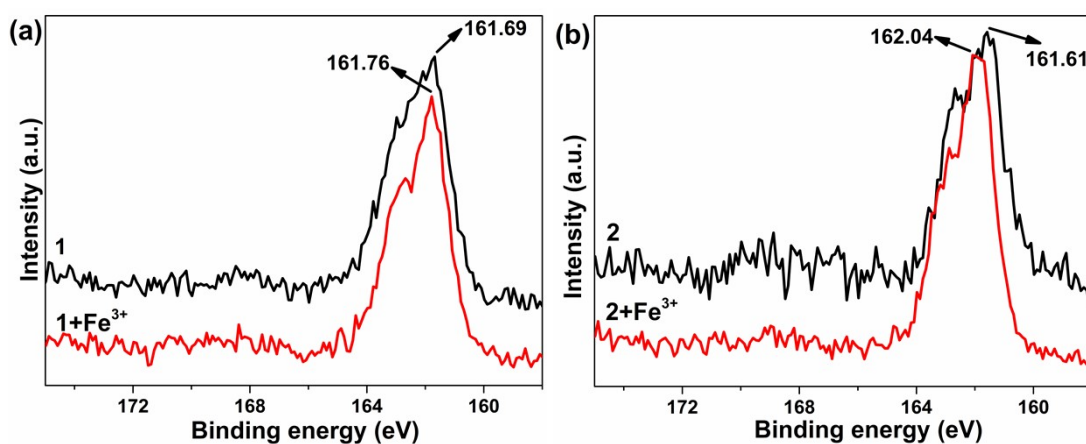

**Fig. S17** S 2p XPS for **1** and  $\text{Fe}^{3+}$  incorporating **1** (a), **2** and  $\text{Fe}^{3+}$  incorporating **2** (b).

**Table S5** The comparison of XPS peak-peak displacement values in **1** and **2**

| <b>1</b>                     |                           |                                   | <b>2</b>                     |                                   |
|------------------------------|---------------------------|-----------------------------------|------------------------------|-----------------------------------|
| $\Delta E_{\text{pyridine}}$ | $\Delta E_{\text{amine}}$ | $\Delta E_{\text{dimethylamino}}$ | $\Delta E_{\text{pyridine}}$ | $\Delta E_{\text{dimethylamino}}$ |

|      |                           |                              |      |                           |                              |
|------|---------------------------|------------------------------|------|---------------------------|------------------------------|
| N 1s | 0.21                      | 0.49                         | 0.06 | 0.30                      | 0.58                         |
|      | $\Delta E_{\text{alkyl}}$ | $\Delta E_{\text{carboxyl}}$ |      | $\Delta E_{\text{alkyl}}$ | $\Delta E_{\text{carboxyl}}$ |
| O 1s | 0.14                      | 0.29                         |      | 0.32                      | 0.47                         |
|      | $\Delta E$                |                              |      | $\Delta E$                |                              |
| S 2p | 0.07                      |                              |      | 0.43                      |                              |

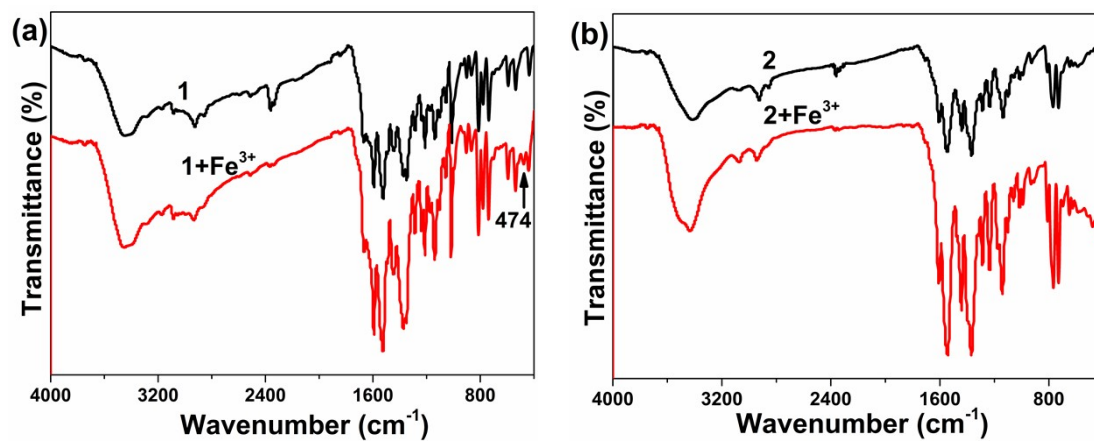

**Fig. S18** (a) FT-IR spectra for compound **1** and Fe<sup>3+</sup> incorporated **1**; (b) FT-IR spectra for compound **2** and Fe<sup>3+</sup> incorporated **2**.
